# Supplementary material for: A novel metal–organic gel based electrolyte for efficient quasi-solid-state dye-sensitized solar cells
Source: Royal Society of Chemistry journal article supplement (doi:10.1039/c4ta03120b), 2014-07-21
Supplement: c4ta03120b1.pdf [file c4ta03120b1.pdf]

## Electronic Supplementary Information

### Novel metal-organic gel based electrolyte for efficient quasi-solid-state dye-sensitized solar cells

Jie Fan, Lei Li, Hua-Shang Rao, Qiu-Li Yang, Jianyong Zhang, Hong-Yan Chen,\* Liuping Chen, Dai-Bin Kuang,\* and Cheng-Yong Su

MOE Key Laboratory of Bioinorganic and Synthetic Chemistry, KLGHEI of Environment and Energy Chemistry, State Key Laboratory of Optoelectronic Materials and Technologies, School of Chemistry and Chemical Engineering, Lehn Institute of Functional Materials, Sun Yat-sen University, Guangzhou 510275, P. R. China. Fax: 86-20-8411-3015; Tel: 86-20-8411-3015; E-mail: chenhy33@mail.sysu.edu.cn; kuangdb@mail.sysu.edu.cn.

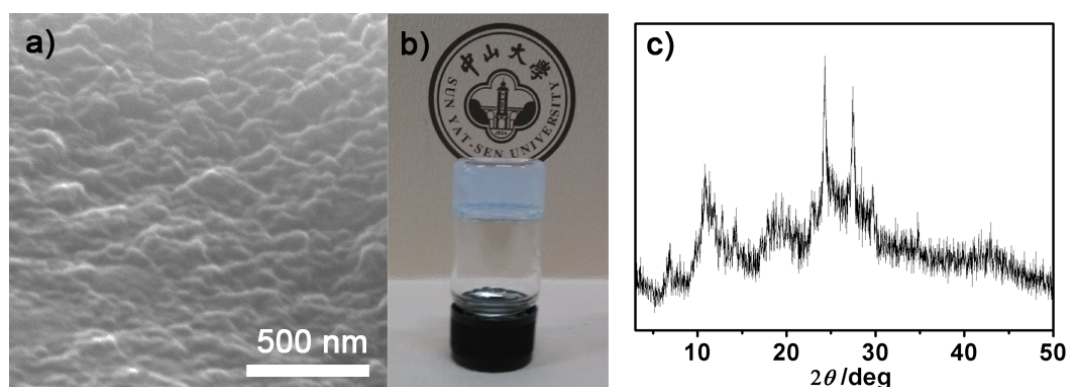

**Fig. S1** (a) SEM image of MOG matrix dried by subcritical CO<sub>2</sub> extraction, with a Al<sup>3+</sup> concentration of 0.2 M, Al<sup>3+</sup>:H<sub>3</sub>BTC=1:1; (b) Digital photograph of as-prepared gel; (c) PXRD pattern of as-prepared aerogel, showing a possible crystal structure of MIL-100(Al).

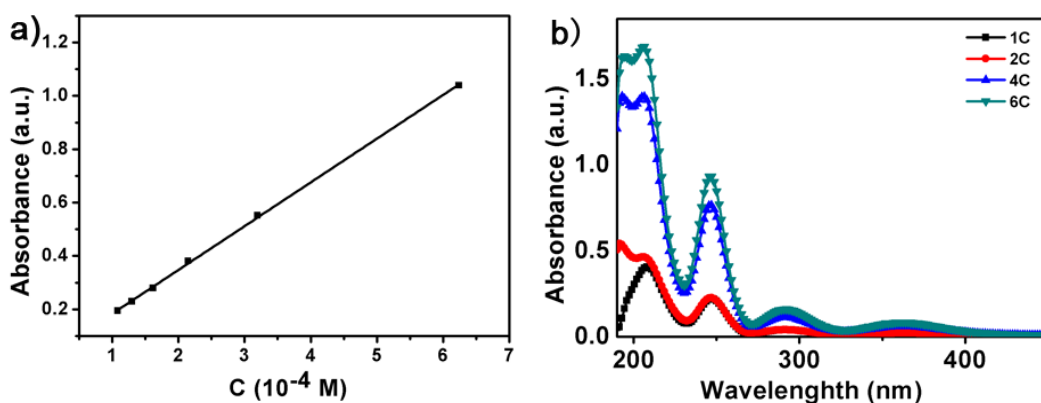

**Fig. S2** (a) The standard curve obtained according to absorption peak at 255 nm, the equation was  $y=0.16403x+0.01957$  ( $R^2=0.99945$ ); b) UV-vis absorption spectrums of residual liquid electrolytes, which were diluted to proper concentration for accurate measurements.

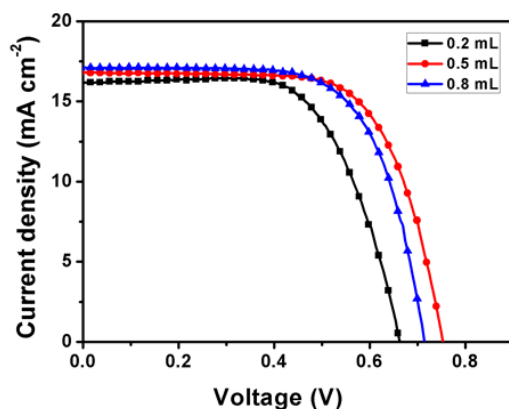

**Fig. S3**  $J-V$  characteristics of DSSCs based on MOGE prepared by swelling gels in liquid precursor with different volume. The concentration of liquid precursor was kept at 4C.

**Table S1** Photovoltaic parameters of MOGE based DSSCs prepared by swelling gels in different amount of precursor with concentration of 4C, and the corresponding concentration of active ingredients in different MOGEs. The cell performances were measured under AM 1.5 G one sun illumination ( $100 \text{ mW cm}^{-2}$ ).

|               | $J_{sc}$ [ $\text{mA cm}^{-2}$ ] | $V_{oc}$ [mV] | $\eta$ [%] | $FF$ | $I$ [ $\text{mol L}^{-1}$ ] | TBP [ $\text{mol L}^{-1}$ ] |
|---------------|----------------------------------|---------------|------------|------|-----------------------------|-----------------------------|
| <b>0.2 mL</b> | 16.18                            | 663           | 7.00       | 0.65 | 0.302                       | 0.175                       |
| <b>0.5 mL</b> | 16.80                            | 753           | 8.66       | 0.68 | 0.591                       | 0.338                       |
| <b>0.8 mL</b> | 17.11                            | 715           | 8.29       | 0.68 | 0.959                       | 0.402                       |
